# Supplementary material for: Observation of aliphatic C–H⋯X hydrogen bonds in imidazolium ionic liquids
Source: Royal Society of Chemistry journal article supplement (doi:10.1039/c4cc09783a), 2015-01-01
Supplement: c4cc09783a1.pdf [file c4cc09783a1.pdf]

## Observation of Aliphatic C-H...X Hydrogen Bonds in Imidazolium Ionic Liquids

Alexander Khrizman, Hiu Yan Cheng, Gualberto Bottini, and Guillermo Moyna

### Supporting Information

#### 1. Synthesis

##### 1.1. General

Deuterated 1-*n*-butyl-3-methylimidazolium chloride isotopologues **1a-1e** were prepared as described.<sup>8</sup> Potassium hexafluorophosphate and sodium tetrafluoroborate were purchased from Sigma-Aldrich, Inc. (St. Louis, MO, USA) and used as received. IR spectra were recorded on a Thermo Electron Nicolet Avatar 370 DTGS FT-IR spectrophotometer. Routine NMR experiments were performed on Bruker AVANCE 400 and AVANCE III 400 spectrometers operating at <sup>1</sup>H and <sup>13</sup>C frequencies of 400.13 and 100.62 MHz, respectively, using CD<sub>2</sub>Cl<sub>2</sub> as solvent. Chemical shifts ( $\delta$ ) are in ppm relative to the residual solvent signal (5.32 and 54.0 ppm for <sup>1</sup>H and <sup>13</sup>C, respectively), and coupling constants ( $J$ ) are reported in Hz. HR-MS spectra were recorded on a Thermo Scientific Exactive Orbitrap mass spectrometer using ASAP ionization.<sup>S1</sup>

##### 1.2. Preparation of 1-*n*-butyl-3-methylimidazolium hexafluorophosphate isotopologues.<sup>S2</sup>

Potassium hexafluorophosphate (1.1 g, 6.0 mmol) was added to a solution of the appropriate 1-*n*-butyl-3-methylimidazolium chloride isotopologue (1.0 g, 5.7 mmol) in distilled water (1.0 mL) in a 10 mL vial fitted with a teflon-lined cap. Following phase separation, the reaction was stirred vigorously for 3 h, diluted with dichloromethane (1 mL) and washed with distilled water (3  $\times$  0.5 mL). The organic layer was further diluted with dichloromethane (5.0 mL), and the resulting solution was dried with MgSO<sub>4</sub>. The solvent was then removed *in vacuo* to yield the desired hexafluorophosphate salts as colorless to pale yellow oils. A Mohr titration of the product indicated that it was free of chloride ion.<sup>S2</sup>

**1.2.1. [<sup>1</sup>,<sup>1</sup>,<sup>1</sup>-d<sub>3</sub>]-1-*n*-Butyl-3-methylimidazolium hexafluorophosphate (**2a**):** Obtained from **1a** in 88% yield. IR (NaCl plate, cm<sup>-1</sup>): 3169, 3117, 2966, 2939, 2878, 1568, 1468, 1386, 1336, 1172, 1114, 840. <sup>1</sup>H NMR:  $\delta$  8.46 (1H, bdd,  $J = 2.0, J = 2.0, H2$ ), 7.29 (1H, ABX,  $J_{AX} = 2.0, J_{AB} = 1.7, H4$ ), 7.28 (1H, ABX,  $J_{AX} = 2.0, J_{AB} = 1.7, H5$ ), 4.15 (3H, t,  $J = 7.4, H1''$ ), 1.86 (2H, tt,  $J = 7.6, J = 7.4, H2'$ ), 1.37 (2H, tq,  $J = 7.6, J = 7.4, H3'$ ), 0.96 (3H, t,  $J = 7.4, H4'$ ). <sup>13</sup>C NMR:  $\delta$  136.2 (C2), 124.2 (C4), 122.8 (C5), 50.6 (C1'), 36.3 (hep,  $^1J_{CD} = 21.9, C1''$ ), 32.3 (C2'), 19.9 (C3'), 13.6 (C4'). HR-MS (ASAP):  $m/z$  calcd for C<sub>8</sub>H<sub>12</sub>D<sub>3</sub>N<sub>2</sub> ([M-PF<sub>6</sub>]<sup>+</sup>): 142.1419, found: 142.1416.

**1.2.2. [<sup>1</sup>,<sup>1</sup>-d<sub>2</sub>]-1-*n*-Butyl-3-methylimidazolium hexafluorophosphate (**2b**):** Obtained from **1b** in 91% yield. IR (NaCl plate, cm<sup>-1</sup>): 3171, 3118, 2966, 2938, 2878, 1575, 1563, 1469, 1432, 1179, 1140, 1113, 841. <sup>1</sup>H NMR:  $\delta$  8.46 (1H, ddq,  $J = 2.0, J = 2.0, J = 0.6, H2$ ), 7.29 (1H, ABX,  $J_{AX} = 2.0, J_{AB} = 1.7, H4$ ), 7.28 (1H, ABX,  $J_{AX} = 2.0, J_{AB} = 1.7, H5$ ), 3.91 (3H, d,  $J = 0.6, H1''$ ), 1.84 (2H, bt,  $J = 7.5, H2'$ ), 1.36 (2H, tq,  $J = 7.5, J = 7.4, H3'$ ), 0.96 (3H, t,  $J = 7.4, H4'$ ). <sup>13</sup>C NMR:  $\delta$  136.2 (C2), 124.2 (C4), 122.8 (C5), 50.0 (quin,  $^1J_{CD} = 21.8, C1'$ ), 36.9 (C1''), 32.1 (C2'), 19.8 (C3'), 13.6 (C4'). HR-MS (ASAP):  $m/z$  calcd for C<sub>8</sub>H<sub>12</sub>D<sub>3</sub>N<sub>2</sub> ([M-PF<sub>6</sub>]<sup>+</sup>): 141.1352, found: 141.1352.

1.2.3. [2',2'-d<sub>2</sub>]-1-*n*-Butyl-3-methylimidazolium hexafluorophosphate (**2c**): Obtained from **1c** in 85% yield. IR (NaCl plate, cm<sup>-1</sup>): 3172, 3124, 2965, 2937, 2878, 1576, 1463, 1432, 1385, 1336, 1171, 1113, 839. <sup>1</sup>H NMR: δ 8.46 (1H, ddq, *J* = 2.0, *J* = 2.0, *J* = 0.6, H2), 7.29 (1H, ABX, *J*<sub>AX</sub> = 2.0, *J*<sub>AB</sub> = 1.7, H4), 7.28 (1H, ABX, *J*<sub>AX</sub> = 2.0, *J*<sub>AB</sub> = 1.7, H5), 4.14 (2H, bs, H1'), 3.91 (3H, d, *J* = 0.6, H1''), 1.35 (2H, bq, *J* = 7.4, H3'), 0.96 (3H, t, *J* = 7.4, H4'). <sup>13</sup>C NMR: δ 136.2 (C2), 124.2 (C4), 122.8 (C5), 50.4 (C1'), 36.9 (C1''), 31.6 (quin, <sup>1</sup>*J*<sub>CD</sub> = 19.7, C2'), 19.7 (C3'), 13.5 (C4'). HR-MS (ASAP): *m/z* calcd for C<sub>8</sub>H<sub>12</sub>D<sub>3</sub>N<sub>2</sub> ([M-PF<sub>6</sub>]<sup>+</sup>): 141.1352, found: 141.1353.

1.2.4. [3',3'-d<sub>2</sub>]-1-*n*-Butyl-3-methylimidazolium hexafluorophosphate (**2d**): Obtained from **1d** in 88% yield. IR (NaCl plate, cm<sup>-1</sup>): 3172, 3125, 2965, 2937, 2877, 1575, 1461, 1432, 1385, 1168, 1113, 841. <sup>1</sup>H NMR: δ 8.47 (1H, bdd, *J* = 1.9, *J* = 1.9, H2), 7.29 (1H, ABX, *J*<sub>AX</sub> = 1.9, *J*<sub>AB</sub> = 1.8, H4), 7.28 (1H, ABX, *J*<sub>AX</sub> = 1.9, *J*<sub>AB</sub> = 1.8, H5), 4.15 (2H, bt, *J* = 7.4, H1'), 3.92 (3H, bs, H1''), 1.83 (2H, tt, *J* = 7.4, <sup>3</sup>*J*<sub>HD</sub> = 1.1, H2'), 0.94 (3H, t, <sup>3</sup>*J*<sub>HD</sub> = 1.1, H4'). <sup>13</sup>C NMR: δ 136.2 (C2), 124.2 (C4), 122.8 (C5), 50.6 (C1'), 36.9 (C1''), 32.1 (C2'), 19.2 (quin, <sup>1</sup>*J*<sub>CD</sub> = 19.3, C3'), 13.4 (C4'). HR-MS (ASAP): *m/z* calcd for C<sub>8</sub>H<sub>12</sub>D<sub>3</sub>N<sub>2</sub> ([M-PF<sub>6</sub>]<sup>+</sup>): 141.1352, found: 141.1353.

1.2.5. [4',4',4',-d<sub>3</sub>]-1-*n*-Butyl-3-methylimidazolium hexafluorophosphate (**2e**): Obtained from **1e** in 86% yield. IR (NaCl plate, cm<sup>-1</sup>): 3171, 3125, 2939, 2872, 2225, 2079, 1575, 1462, 1432, 1390, 1340, 1168, 1114, 839. <sup>1</sup>H NMR: δ 8.46 (1H, bdd, *J* = 1.9, *J* = 1.9, H2), 7.29 (1H, ABX, *J*<sub>AX</sub> = 1.9, *J*<sub>AB</sub> = 1.8, H4), 7.28 (1H, ABX, *J*<sub>AX</sub> = 1.9, *J*<sub>AB</sub> = 1.8, H5), 4.15 (2H, t, *J* = 7.4, H1'), 3.91 (3H, s, H1''), 1.85 (2H, tt, *J* = 7.7, *J* = 7.4, H2'), 1.34 (2H, tt, *J* = 7.7, <sup>3</sup>*J*<sub>HD</sub> = 1.1, H3'). <sup>13</sup>C NMR: δ 136.2 (C2), 124.2 (C4), 122.8 (C5), 50.6 (C1''), 36.8 (C1'), 32.2 (C2'), 19.6 (C3'), 12.7 (hep, <sup>1</sup>*J*<sub>CD</sub> = 19.2, C4'). HR-MS (ASAP): *m/z* calcd for C<sub>8</sub>H<sub>12</sub>D<sub>3</sub>N<sub>2</sub> ([M-PF<sub>6</sub>]<sup>+</sup>): 142.1419, found: 142.1416.

### 1.3. Preparation of 1-*n*-butyl-3-methylimidazolium tetrafluoroborate isotopologues.<sup>S2</sup>

Sodium tetrafluoroborate (0.8 g, 7.3 mmol) was added to a solution of the appropriate 1-*n*-butyl-3-methylimidazolium chloride isotopologue (1.2 g, 6.8 mmol) in distilled water (1.4 mL) in a 10 mL vial fitted with a teflon-lined cap. The mixture was stirred until phase separation occurred, shaken vigorously for an additional 10 min, and extracted with dichloromethane (2 × 1.5 mL). The combined organic layers were washed with a 4.5 M solution of sodium tetrafluoroborate (0.8 mL), dried with MgSO<sub>4</sub>, and filtered through celite. The solvent was removed under reduced pressure to yield the desired tetrafluoroborate salts as colorless to pale yellow oils. A Mohr titration of the product indicated that it was free of chloride ion.<sup>S2</sup>

1.3.1. [1'',1'',1''-d<sub>3</sub>]-1-*n*-Butyl-3-methylimidazolium tetrafluoroborate (**3a**): Obtained from **1a** in 91% yield. IR (NaCl plate, cm<sup>-1</sup>): 3155, 3114, 2964, 2939, 2879, 1568, 1466, 1386, 1336, 1285, 1174, 1064. <sup>1</sup>H NMR: δ 8.74 (1H, bdd, *J* = 1.9, *J* = 1.9, H2), 7.32 (1H, dd, *J* = 1.9, *J* = 1.8, H4), 7.30 (1H, dd, *J* = 1.9, *J* = 1.8, H5), 4.17 (2H, t, *J* = 7.4, H1'), 1.85 (2H, tt, *J* = 7.6, *J* = 7.4, H2'), 1.36 (2H, tq, *J* = 7.6, *J* = 7.4, H3'), 0.95 (3H, t, *J* = 7.4, H4'). <sup>13</sup>C NMR: δ 136.3 (C2), 123.6 (C4), 122.1 (C5), 49.9 (C1'), 35.6 (hep, <sup>1</sup>*J*<sub>CD</sub> = 22.0, C1''), 31.8 (C2'), 19.3 (C3'), 13.1 (C4'). HR-MS (ASAP): *m/z* calcd for C<sub>8</sub>H<sub>12</sub>D<sub>3</sub>N<sub>2</sub> ([M-BF<sub>4</sub>]<sup>+</sup>): 142.1419, found: 142.1411.

1.3.2. [1',1'-d<sub>2</sub>]-1-*n*-Butyl-3-methylimidazolium tetrafluoroborate (**3b**): Obtained from **1b** in 89% yield. IR (NaCl plate, cm<sup>-1</sup>): 3157, 3115, 2964, 2937, 2877, 1575, 1562, 1468, 1433, 1374, 1331, 1285, 1249, 1180. <sup>1</sup>H NMR: δ 8.75 (1H, bdd, *J* = 1.9, *J* = 1.9, H2), 7.32 (1H, dd, *J* = 1.9, *J* = 1.8, H4), 7.30 (1H, dd, *J* = 1.9, *J* = 1.8, H5), 3.93 (3H, bs, H1''), 1.84 (2H, bt, *J* = 7.6, H2'), 1.36 (2H, tq, *J* = 7.6, *J* =

7.4, H3'), 0.96 (3H, t,  $J = 7.4$ , H4').  $^{13}\text{C}$  NMR:  $\delta$  136.9 (C2), 124.1 (C4), 122.6 (C5), 49.9 (quin,  $^1J_{\text{CD}} = 21.8$ , C1'), 36.8 (C1''), 32.2 (C2'), 19.8 (C3'), 13.6 (C4'). HR-MS (ASAP):  $m/z$  calcd for  $\text{C}_8\text{H}_{13}\text{D}_2\text{N}_2$  ( $[\text{M-BF}_4]^+$ ): 141.1356, found: 141.1350.

*1.3.3. [2',2'-d<sub>2</sub>]-1-n-Butyl-3-methylimidazolium tetrafluoroborate (3c)*: Obtained from **1c** in 90% yield. IR (NaCl plate,  $\text{cm}^{-1}$ ): 3166, 3124, 2965, 2938, 2876, 1575, 1464, 1431, 1385, 1335, 1286, 1173, 1049.  $^1\text{H}$  NMR:  $\delta$  8.74 (1H, bdd,  $J = 1.9$ ,  $J = 1.9$ , H2), 7.32 (1H, dd,  $J = 1.9$ ,  $J = 1.8$ , H4), 7.30 (1H, dd,  $J = 1.9$ ,  $J = 1.8$ , H5), 4.16 (2H, bs, H1'), 3.93 (3H, s, H1''), 1.35 (2H, bq,  $J = 7.4$ , H3'), 0.95 (3H, t,  $J = 7.4$ , H4').  $^{13}\text{C}$  NMR:  $\delta$  136.9 (C2), 124.1 (C4), 122.7 (C5), 50.3 (C1'), 36.8 (C1''), 31.6 (quin,  $^1J_{\text{CD}} = 19.7$ , C2'), 19.7 (C3'), 13.6 (C4'). HR-MS (ASAP):  $m/z$  calcd for  $\text{C}_8\text{H}_{13}\text{D}_2\text{N}_2$  ( $[\text{M-BF}_4]^+$ ): 141.1356, found: 141.1351.

*1.3.4. [3',3'-d<sub>2</sub>]-1-n-Butyl-3-methylimidazolium tetrafluoroborate (3d)*: Obtained from **1d** in 88% yield. IR (NaCl plate,  $\text{cm}^{-1}$ ): 3157, 3132, 2964, 2935, 2874 1575, 1461, 1432, 1383, 1286, 1171, 1051.  $^1\text{H}$  NMR:  $\delta$  8.74 (1H, bdd,  $J = 1.9$ ,  $J = 1.9$ , H2), 7.32 (1H, dd,  $J = 1.9$ ,  $J = 1.8$ , H4), 7.30 (1H, dd,  $J = 1.9$ ,  $J = 1.8$ , H5), 4.17 (2H, bt,  $J = 7.4$ , H1'), 3.93 (3H, s, H1''), 1.84 (2H, tt,  $J = 7.4$ ,  $^3J_{\text{HD}} = 1.1$ , H2'), 0.94 (3H, t,  $^3J_{\text{HD}} = 1.1$ , H4').  $^{13}\text{C}$  NMR:  $\delta$  136.9 (C2), 124.1 (C4), 122.7 (C5), 50.4 (C1'), 36.8 (C1''), 32.2 (C2'), 19.2 (quin,  $^1J_{\text{CD}} = 19.3$ , C3'), 13.4 (C4'). HR-MS (ASAP):  $m/z$  calcd for  $\text{C}_8\text{H}_{13}\text{D}_2\text{N}_2$  ( $[\text{M-BF}_4]^+$ ): 141.1356, found: 141.1352.

*1.3.5. [4',4',4',-d<sub>3</sub>]-1-n-Butyl-3-methylimidazolium tetrafluoroborate (3e)*: Obtained from **1e** in 88% yield. IR (NaCl plate,  $\text{cm}^{-1}$ ): 3164, 3122, 2937, 2870, 2222, 2077, 1574, 1462, 1432, 1339, 1286, 1170, 1061.  $^1\text{H}$  NMR:  $\delta$  8.75 (1H, bdd,  $J = 1.9$ ,  $J = 1.9$ , H2), 7.32 (1H, dd,  $J = 1.9$ ,  $J = 1.8$ , H4), 7.30 (1H, dd,  $J = 1.9$ ,  $J = 1.8$ , H5), 4.17 (2H, t,  $J = 7.4$ , H1'), 3.93 (3H, s, H1''), 1.85 (2H, tt,  $J = 7.7$ ,  $J = 7.4$ , H2'), 1.34 (2H, tt,  $J = 7.7$ ,  $^3J_{\text{HD}} = 1.1$ , H3').  $^{13}\text{C}$  NMR:  $\delta$  136.9 (C2), 124.1 (C4), 122.7 (C5), 50.5 (C1''), 36.8 (C1'), 32.3 (C2'), 19.6 (C3'), 12.7 (hep,  $^1J_{\text{CD}} = 19.2$ , C4'). HR-MS (ASAP):  $m/z$  calcd for  $\text{C}_8\text{H}_{12}\text{D}_3\text{N}_2$  ( $[\text{M-BF}_4]^+$ ): 142.1419, found: 142.1415.

## 2. Isotope Effect on Nuclear Shielding Measurements

### 2.1. Sample preparation

All imidazolium isotopologues were dried under reduced pressure ( $< 1 \times 10^{-3}$  mBar) at 50 °C with constant stirring and regular argon exchanges for 48 hours. The samples were then placed in an argon-filled glove box and allowed to equilibrate for 24 hours. After that time they were transferred to 5 mm NMR tubes, and these were subsequently fitted with 60  $\mu\text{L}$  coaxial inserts containing reference solutions. For hexafluorophosphate salts **2-2e**, the reference was 1M  $\text{Na}_2\text{HPO}_4$  and trifluoroacetic acid in  $\text{D}_2\text{O}$ , while for tetrafluoroborate salts **3-3e** it was 1M  $\text{NaBF}_4$  and trifluoroacetic acid in  $\text{D}_2\text{O}$ . In addition, systems containing **2e** and **2** or **3e** and **3** in the outer tube and coaxial insert, respectively, were prepared. All sample systems were tightly sealed and used in NMR measurements within two hours following preparation.

### 2.3. NMR experiments

NMR experiments were carried out at 30.0 °C on a Bruker Avance III 400 NMR spectrometer operating at  $^1\text{H}$ ,  $^{11}\text{B}$ ,  $^{19}\text{F}$ , and  $^{31}\text{P}$  frequencies of 400.13, 128.39, 376.50, and 161.98 MHz, respectively.  $^1\text{H}$ ,  $^{11}\text{B}$ ,  $^{19}\text{F}$ , and  $^{31}\text{P}$  spectra were referenced against the  $^1\text{H}$  resonance of HDO, the  $^{11}\text{B}$  resonance of 1M  $\text{NaBF}_4$  in  $\text{D}_2\text{O}$ , the  $^{19}\text{F}$  resonance of 1M trifluoroacetic acid or 1M  $\text{NaBF}_4$  in  $\text{D}_2\text{O}$ , and the  $^{31}\text{P}$

resonance of 1M Na<sub>2</sub>HPO<sub>4</sub> in D<sub>2</sub>O, respectively. In all cases the reference signal was arbitrarily set to 0 ppm. Acquisition times, spectral widths, and data sizes were adjusted to obtain a minimum resolution of 0.2 Hz per point. The data was zero-filled to a final resolution of 0.1 Hz per point prior to Fourier transformation. For the samples that contained **2e** and **2** or **3e** and **3** in the outer tube and coaxial insert, respectively, field-frequency lock was achieved against the deuterium signal of the labeled imidazolium salt. The data recorded for three different samples of each isotopologue was averaged in the estimation of  $\Delta(\text{H,D})$  values, and the results are summarized in **Tables S1-S6** and **Tables S7-S12**.

### 3. References

- S1. C. N. McEwen, R. G. McKay and B. S. Larsen, *Anal. Chem.*, 2005, **77**, 7826.
- S2. X. Creary and E. D. Willis, *Org. Synth.*, 2005, **82**, 166.

**Table S1.**  $^1\text{H}$ ,  $^{31}\text{P}$ , and  $^{19}\text{F}$  chemical shifts for **2**. Data for repeats obtained for three different samples and their averages are reported.

| Nuclei          | $\delta$ (Hz) |          |          |                    | $\Delta(\text{H,D}) \pm \text{s.d. (ppb)}$ |
|-----------------|---------------|----------|----------|--------------------|--------------------------------------------|
|                 | Repeat 1      | Repeat 2 | Repeat 3 | Average $\pm$ s.d. |                                            |
| H-2             | 1428.5        | 1428.7   | 1428.6   | $1428.6 \pm 0.1$   | -                                          |
| H-4             | 1031.3        | 1031.5   | 1031.3   | $1031.4 \pm 0.1$   | -                                          |
| H-5             | 1016.4        | 1016.6   | 1016.5   | $1016.5 \pm 0.1$   | -                                          |
| H-1'            | -276.8        | -276.6   | -276.7   | $-276.7 \pm 0.1$   | -                                          |
| H-2'            | -1206.5       | -1206.3  | -1206.4  | $-1206.4 \pm 0.1$  | -                                          |
| H-3'            | -1425.0       | -1424.8  | -1424.9  | $-1424.9 \pm 0.1$  | -                                          |
| H-4'            | -1600.8       | -1600.6  | -1600.7  | $-1600.7 \pm 0.1$  | -                                          |
| H-1''           | -384.0        | -383.8   | -383.9   | $-383.9 \pm 0.1$   | -                                          |
| $^{31}\text{P}$ | -23411.3      | -23411.4 | -23410.9 | $-23411.2 \pm 0.3$ | -                                          |
| $^{19}\text{F}$ | 1422.4        | 1422.3   | 1422.4   | $1422.4 \pm 0.1$   | -                                          |

**Table S2.**  $^1\text{H}$ ,  $^{31}\text{P}$ , and  $^{19}\text{F}$  chemical shift data for **2a**. Data for repeats obtained for three different samples, their averages, and H/D isotope effects observed with respect to **2** for all nuclei are reported.

| Nuclei          | $\delta$ (Hz) |          |          |                    | $\Delta(\text{H,D}) \pm \text{s.d. (ppb)}$ |
|-----------------|---------------|----------|----------|--------------------|--------------------------------------------|
|                 | Repeat 1      | Repeat 2 | Repeat 3 | Average $\pm$ s.d. |                                            |
| H-2             | 1427.9        | 1427.8   | 1427.9   | $1427.9 \pm 0.1$   | $1.7 \pm 0.5$                              |
| H-4             | 1030.0        | 1029.9   | 1030.1   | $1030.0 \pm 0.1$   | $3.5 \pm 0.5$                              |
| H-5             | 1015.2        | 1015.1   | 1015.2   | $1015.2 \pm 0.1$   | $3.2 \pm 0.5$                              |
| H-1'            | -278.7        | -278.8   | -278.7   | $-278.7 \pm 0.1$   | $5.0 \pm 0.5$                              |
| H-2'            | -1209.2       | -1209.3  | -1209.2  | $-1209.2 \pm 0.1$  | $7.0 \pm 0.5$                              |
| H-3'            | -1435.4       | -1435.6  | -1435.5  | $-1435.5 \pm 0.1$  | $26.5 \pm 0.5$                             |
| H-4'            | -             | -        | -        | -                  | -                                          |
| H-1''           | -385.4        | -385.5   | -385.4   | $-385.4 \pm 0.1$   | $3.7 \pm 0.5$                              |
| $^{31}\text{P}$ | -23411.9      | -23411.6 | -23411.7 | $-23411.7 \pm 0.2$ | $3.1 \pm 3.1$                              |
| $^{19}\text{F}$ | 1419.6        | 1419.7   | 1419.8   | $1419.7 \pm 0.1$   | $7.2 \pm 0.5$                              |

**Table S3.**  $^1\text{H}$ ,  $^{31}\text{P}$ , and  $^{19}\text{F}$  chemical shift data for **2b**. Data for repeats obtained for three different samples, their averages, and H/D isotope effects observed with respect to **2** for all nuclei are reported.

| Nuclei          | $\delta$ (Hz) |          |          |                    | $\Delta(\text{H,D}) \pm \text{s.d. (ppb)}$ |
|-----------------|---------------|----------|----------|--------------------|--------------------------------------------|
|                 | Repeat 1      | Repeat 2 | Repeat 3 | Average $\pm$ s.d. |                                            |
| H-2             | 1427.9        | 1428.4   | 1428.3   | $1428.2 \pm 0.3$   | $1.0 \pm 1.0$                              |
| H-4             | 1030.2        | 1030.7   | 1030.7   | $1030.5 \pm 0.3$   | $2.0 \pm 1.0$                              |
| H-5             | 1015.6        | 1016.1   | 1016.0   | $1015.9 \pm 0.3$   | $1.5 \pm 1.0$                              |
| H-1'            | -278.4        | -277.9   | -278.0   | $-278.1 \pm 0.3$   | $3.5 \pm 1.0$                              |
| H-2'            | -1213.5       | -1213.0  | -1213.1  | $-1213.2 \pm 0.3$  | $17.0 \pm 1.0$                             |
| H-3'            | -             | -        | -        | -                  | -                                          |
| H-4'            | -1608.8       | -1608.3  | -1608.3  | $-1608.5 \pm 0.3$  | $19.5 \pm 1.0$                             |
| H-1''           | -384.9        | -384.4   | -384.5   | $-384.6 \pm 0.3$   | $1.7 \pm 1.0$                              |
| $^{31}\text{P}$ | -23410.8      | -23410.8 | -23411.0 | $-23410.9 \pm 0.1$ | $-1.9 \pm 2.5$                             |
| $^{19}\text{F}$ | 1418.9        | 1419.1   | 1418.5   | $1418.8 \pm 0.3$   | $9.6 \pm 1.1$                              |

**Table S4.**  $^1\text{H}$ ,  $^{31}\text{P}$ , and  $^{19}\text{F}$  chemical shift data for **2c**. Data for repeats obtained for three different samples, their averages, and H/D isotope effects observed with respect to **2** for all nuclei are reported.

| Nuclei          | $\delta$ (Hz) |          |          |                    | $\Delta(\text{H,D}) \pm \text{s.d. (ppb)}$ |
|-----------------|---------------|----------|----------|--------------------|--------------------------------------------|
|                 | Repeat 1      | Repeat 2 | Repeat 3 | Average $\pm$ s.d. |                                            |
| H-2             | 1429.6        | 1429.1   | 1429.6   | $1429.4 \pm 0.3$   | $-2.0 \pm 1.0$                             |
| H-4             | 1031.9        | 1031.4   | 1031.9   | $1031.7 \pm 0.3$   | $-1.0 \pm 1.0$                             |
| H-5             | 1017.3        | 1016.8   | 1017.3   | $1017.1 \pm 0.3$   | $-1.5 \pm 1.0$                             |
| H-1'            | -280.6        | -281.1   | -280.5   | $-280.7 \pm 0.3$   | $10.0 \pm 1.0$                             |
| H-2'            | -             | -        | -        | -                  | -                                          |
| H-3'            | -1429.1       | -1429.6  | -1429    | $-1429.2 \pm 0.3$  | $10.7 \pm 1.0$                             |
| H-4'            | -1600.8       | -1601.3  | -1600.8  | $-1601.0 \pm 0.3$  | $0.7 \pm 1.0$                              |
| H-1''           | -383.3        | -384.1   | -383.2   | $-383.5 \pm 0.5$   | $-1.0 \pm 1.5$                             |
| $^{31}\text{P}$ | -23410.4      | -23410.7 | -23410.4 | $-23410.5 \pm 0.2$ | $-4.3 \pm 3.1$                             |
| $^{19}\text{F}$ | 1418.9        | 1418.8   | 1418.6   | $1418.8 \pm 0.2$   | $9.6 \pm 0.8$                              |



**Table S5.**  $^1\text{H}$ ,  $^{31}\text{P}$ , and  $^{19}\text{F}$  chemical shift data for **2d**. Data for repeats obtained for three different samples, their averages, and H/D isotope effects observed with respect to **2** for all nuclei are reported.

| Nuclei          | $\delta$ (Hz) |          |          |                    | $\Delta(\text{H,D}) \pm \text{s.d. (ppb)}$ |
|-----------------|---------------|----------|----------|--------------------|--------------------------------------------|
|                 | Repeat 1      | Repeat 2 | Repeat 3 | Average $\pm$ s.d. |                                            |
| H-2             | 1428.8        | 1428.9   | 1429.1   | $1428.9 \pm 0.2$   | $-0.7 \pm 0.7$                             |
| H-4             | 1031.4        | 1031.5   | 1031.7   | $1031.5 \pm 0.2$   | $-0.2 \pm 0.7$                             |
| H-5             | 1016.8        | 1017.0   | 1017.1   | $1017.0 \pm 0.2$   | $-1.2 \pm 0.7$                             |
| H-1'            | -             | -        | -        | -                  | -                                          |
| H-2'            | -1211.7       | -1211.4  | -1211.3  | $-1211.5 \pm 0.2$  | $12.7 \pm 0.7$                             |
| H-3'            | -1425.2       | -1425.0  | -1424.9  | $-1425.0 \pm 0.2$  | $0.2 \pm 0.7$                              |
| H-4'            | -1600.5       | -1600.3  | 1600.2   | $-1600.3 \pm 0.2$  | $-1.0 \pm 0.7$                             |
| H-1''           | -383.5        | -383.3   | -383.2   | $-383.3 \pm 0.2$   | $-1.5 \pm 0.7$                             |
| $^{31}\text{P}$ | 23411.3       | 23411.5  | 23411.4  | $23411.4 \pm 0.1$  | $-1.2 \pm 2.5$                             |
| $^{19}\text{F}$ | 1418.9        | 1418.8   | 1418.5   | $1418.7 \pm 0.2$   | $9.8 \pm 0.8$                              |

**Table S6.**  $^1\text{H}$ ,  $^{31}\text{P}$ , and  $^{19}\text{F}$  chemical shift data for **2e**. Data for repeats obtained for three different samples, their averages, and H/D isotope effects observed with respect to **2** for all nuclei are reported.

| Nuclei          | $\delta$ (Hz) |          |          |                    | $\Delta(\text{H,D}) \pm \text{s.d. (ppb)}$ |
|-----------------|---------------|----------|----------|--------------------|--------------------------------------------|
|                 | Repeat 1      | Repeat 2 | Repeat 3 | Average $\pm$ s.d. |                                            |
| H-2             | 1427.5        | 1427.5   | 1427.9   | $1427.6 \pm 0.2$   | $2.5 \pm 0.7$                              |
| H-4             | 1030.8        | 1030.7   | 1031.1   | $1030.9 \pm 0.2$   | $1.2 \pm 0.7$                              |
| H-5             | 1015.5        | 1015.4   | 1015.8   | $1015.6 \pm 0.2$   | $2.2 \pm 0.7$                              |
| H-1'            | -277.1        | -277.2   | -276.8   | $-277.0 \pm 0.2$   | $0.7 \pm 0.7$                              |
| H-2'            | -1207.1       | -1207.1  | -1206.7  | $-1207.0 \pm 0.2$  | $1.5 \pm 0.7$                              |
| H-3'            | -1425.5       | -1425.5  | -1425.1  | $-1425.4 \pm 0.2$  | $1.2 \pm 0.7$                              |
| H-4'            | -1601.2       | -1601.2  | -1600.8  | $-1601.1 \pm 0.2$  | $1.0 \pm 0.7$                              |
| H-1''           | -             | -        | -        | -                  | -                                          |
| $^{31}\text{P}$ | -23410.8      | -23410.8 | -23410.8 | $-23410.8 \pm 0.0$ | $-2.5 \pm 1.9$                             |
| $^{19}\text{F}$ | 1412.6        | 1412.7   | 1412.6   | $1412.6 \pm 0.1$   | $26.0 \pm 0.5$                             |

**Table S7.**  $^1\text{H}$ ,  $^{11}\text{B}$ , and  $^{19}\text{F}$  chemical shifts for **3**. Data for repeats obtained for three different samples and their averages are reported.

| Nuclei          | $\delta$ (Hz) |          |          |                    | $\Delta(\text{H,D}) \pm \text{s.d. (ppb)}$ |
|-----------------|---------------|----------|----------|--------------------|--------------------------------------------|
|                 | Repeat 1      | Repeat 2 | Repeat 3 | Average $\pm$ s.d. |                                            |
| H-2             | 1362.6        | 1362.5   | 1362.6   | $1362.6 \pm 0.1$   | -                                          |
| H-4             | 927.9         | 927.8    | 927.9    | $927.9 \pm 0.1$    | -                                          |
| H-5             | 907.0         | 906.9    | 907.0    | $907.0 \pm 0.1$    | -                                          |
| H-1'            | -420.5        | -420.6   | -420.5   | $-420.5 \pm 0.1$   | -                                          |
| H-2'            | -1375.5       | -1375.6  | -1375.4  | $-1375.5 \pm 0.1$  | -                                          |
| H-3'            | -1595.8       | -1596.0  | -1595.8  | $-1595.9 \pm 0.1$  | -                                          |
| H-4'            | -1770.7       | -1770.8  | -1770.7  | $-1770.7 \pm 0.1$  | -                                          |
| H-1''           | -531.2        | -531.3   | -531.1   | $-531.2 \pm 0.1$   | -                                          |
| $^{11}\text{B}$ | 42.8          | 42.8     | 42.9     | $42.8 \pm 0.1$     | -                                          |
| $^{19}\text{F}$ | -27941.0      | -27940.9 | -27940.9 | $-27940.9 \pm 0.1$ | -                                          |

**Table S8.**  $^1\text{H}$ ,  $^{11}\text{B}$ , and  $^{19}\text{F}$  chemical shift data for **3a**. Data for repeats obtained for three different samples, their averages, and H/D isotope effects observed with respect to **3** for all nuclei are reported.

| Nuclei          | $\delta$ (Hz) |          |          |                    | $\Delta(\text{H,D}) \pm \text{s.d. (ppb)}$ |
|-----------------|---------------|----------|----------|--------------------|--------------------------------------------|
|                 | Repeat 1      | Repeat 2 | Repeat 3 | Average $\pm$ s.d. |                                            |
| H-2             | 1362.8        | 1362.3   | 1362.9   | $1362.7 \pm 0.3$   | $-0.2 \pm 1.0$                             |
| H-4             | 928.3         | 927.8    | 927.4    | $927.8 \pm 0.5$    | $0.0 \pm 1.5$                              |
| H-5             | 907.4         | 906.9    | 906.5    | $906.9 \pm 0.5$    | $0.0 \pm 1.5$                              |
| H-1'            | -420.4        | -420.9   | -421.3   | $-420.9 \pm 0.5$   | $0.7 \pm 1.5$                              |
| H-2'            | -1375.8       | -1376.3  | -1376.7  | $-1376.3 \pm 0.5$  | $2.0 \pm 1.5$                              |
| H-3'            | -1604.0       | -1604.6  | -1604.9  | $-1604.5 \pm 0.5$  | $21.5 \pm 1.5$                             |
| H-4'            | -             | -        | -        | -                  | -                                          |
| H-1''           | -530.5        | -531.1   | -531.5   | $-531.0 \pm 0.5$   | $-0.5 \pm 1.5$                             |
| $^{11}\text{B}$ | 43.1          | 42.9     | 42.8     | $42.9 \pm 0.2$     | $0.8 \pm 2.3$                              |
| $^{19}\text{F}$ | -27944.2      | -27944.2 | -27944.5 | $-27944.3 \pm 0.2$ | $9.0 \pm 0.8$                              |

**Table S9.**  $^1\text{H}$ ,  $^{11}\text{B}$ , and  $^{19}\text{F}$  chemical shift data for **3b**. Data for repeats obtained for three different samples, their averages, and H/D isotope effects observed with respect to **3** for all nuclei are reported.

| Nuclei          | $\delta$ (Hz) |          |          |                    | $\Delta(\text{H,D}) \pm \text{s.d. (ppb)}$ |
|-----------------|---------------|----------|----------|--------------------|--------------------------------------------|
|                 | Repeat 1      | Repeat 2 | Repeat 3 | Average $\pm$ s.d. |                                            |
| H-2             | 1361.6        | 1361.4   | 1361.3   | $1361.4 \pm 0.2$   | $2.7 \pm 0.7$                              |
| H-4             | 927.3         | 927.0    | 926.9    | $927.1 \pm 0.2$    | $2.0 \pm 0.7$                              |
| H-5             | 906.5         | 906.3    | 906.2    | $906.3 \pm 0.2$    | $1.5 \pm 0.7$                              |
| H-1'            | -421.4        | -421.6   | -421.7   | $-421.6 \pm 0.2$   | $2.5 \pm 0.7$                              |
| H-2'            | -1381.7       | -1381.9  | -1381.9  | $-1381.8 \pm 0.1$  | $15.7 \pm 0.5$                             |
| H-3'            | -             | -        | -        | -                  | -                                          |
| H-4'            | -1777.8       | -1778.0  | -1778.1  | $-1778.0 \pm 0.2$  | $18.0 \pm 0.7$                             |
| H-1''           | -531.3        | -531.5   | -531.7   | $-531.5 \pm 0.2$   | $0.7 \pm 0.7$                              |
| $^{11}\text{B}$ | 42.6          | 42.6     | 42.6     | $42.6 \pm 0.0$     | $-1.6 \pm 0.8$                             |
| $^{19}\text{F}$ | -27945.0      | -27944.7 | -27944.6 | $-27944.8 \pm 0.2$ | $10.1 \pm 0.8$                             |

**Table S10.**  $^1\text{H}$ ,  $^{11}\text{B}$ , and  $^{19}\text{F}$  chemical shift data for **3c**. Data for repeats obtained for three different samples, their averages, and H/D isotope effects observed with respect to **3** for all nuclei are reported.

| Nuclei          | $\delta$ (Hz) |          |          |                    | $\Delta(\text{H,D}) \pm \text{s.d. (ppb)}$ |
|-----------------|---------------|----------|----------|--------------------|--------------------------------------------|
|                 | Repeat 1      | Repeat 2 | Repeat 3 | Average $\pm$ s.d. |                                            |
| H-2             | 1362.6        | 1362.1   | 1362.5   | $1362.4 \pm 0.3$   | $0.5 \pm 1.0$                              |
| H-4             | 928.4         | 927.9    | 928.3    | $928.2 \pm 0.3$    | $-0.7 \pm 1.0$                             |
| H-5             | 907.6         | 907.1    | 907.5    | $907.4 \pm 0.3$    | $-1.0 \pm 1.0$                             |
| H-1'            | -424.3        | -424.8   | -424.4   | $-424.5 \pm 0.3$   | $10.0 \pm 1.0$                             |
| H-2'            | -             | -        | -        | -                  | -                                          |
| H-3'            | -1599.5       | -1600.1  | -1599.6  | $-1599.7 \pm 0.3$  | $9.7 \pm 1.0$                              |
| H-4'            | -1770.2       | -1770.7  | -1770.3  | $-1770.4 \pm 0.3$  | $-0.7 \pm 1.0$                             |
| H-1''           | -530.2        | -530.7   | -530.4   | $-530.4 \pm 0.3$   | $-2.0 \pm 1.0$                             |
| $^{11}\text{B}$ | 43.1          | 43.0     | 43.0     | $43.0 \pm 0.1$     | $1.6 \pm 1.6$                              |
| $^{19}\text{F}$ | -27945.7      | -27945.2 | -27945.7 | $-27945.5 \pm 0.3$ | $12.2 \pm 1.1$                             |

**Table S11.**  $^1\text{H}$ ,  $^{11}\text{B}$ , and  $^{19}\text{F}$  chemical shift data for **3d**. Data for repeats obtained for three different samples, their averages, and H/D isotope effects observed with respect to **3** for all nuclei are reported.

| Nuclei          | $\delta$ (Hz) |          |          |                    | $\Delta(\text{H,D}) \pm \text{s.d. (ppb)}$ |
|-----------------|---------------|----------|----------|--------------------|--------------------------------------------|
|                 | Repeat 1      | Repeat 2 | Repeat 3 | Average $\pm$ s.d. |                                            |
| H-2             | 1363.3        | 1363.4   | 1363.6   | $1363.4 \pm 0.2$   | $-2.2 \pm 0.7$                             |
| H-4             | 928.4         | 928.4    | 928.6    | $928.5 \pm 0.1$    | $-1.5 \pm 0.5$                             |
| H-5             | 907.8         | 907.9    | 908.1    | $907.9 \pm 0.2$    | $-2.5 \pm 0.7$                             |
| H-1'            | -             | -        | -        | -                  | -                                          |
| H-2'            | -1379.8       | -1380.0  | -1379.6  | $-1379.8 \pm 0.2$  | $10.7 \pm 0.7$                             |
| H-3'            | -1595.4       | -1595.2  | -1595.1  | $-1595.2 \pm 0.2$  | $-1.5 \pm 0.7$                             |
| H-4'            | -1769.9       | -1769.8  | -1769.6  | $-1769.8 \pm 0.2$  | $-2.5 \pm 0.7$                             |
| H-1''           | -530.1        | -530.0   | -529.9   | $-530.0 \pm 0.1$   | $-3.0 \pm 0.5$                             |
| $^{11}\text{B}$ | 43.1          | 43.0     | 43.3     | $43.1 \pm 0.2$     | $2.3 \pm 2.3$                              |
| $^{19}\text{F}$ | -27950.8      | -27950.7 | -27950.9 | $-27950.8 \pm 0.1$ | $26.3 \pm 0.5$                             |

**Table S12.**  $^1\text{H}$ ,  $^{11}\text{B}$ , and  $^{19}\text{F}$  chemical shift data for **3e**. Data for repeats obtained for three different samples, their averages, and H/D isotope effects observed with respect to **3** for all nuclei are reported.

| Nuclei          | $\delta$ (Hz) |          |          |                    | $\Delta(\text{H,D}) \pm \text{s.d. (ppb)}$ |
|-----------------|---------------|----------|----------|--------------------|--------------------------------------------|
|                 | Repeat 1      | Repeat 2 | Repeat 3 | Average $\pm$ s.d. |                                            |
| H-2             | 1361.2        | 1361.0   | 1361.2   | $1361.1 \pm 0.1$   | $3.5 \pm 0.5$                              |
| H-4             | 927.2         | 927.0    | 927.3    | $927.2 \pm 0.2$    | $1.7 \pm 0.7$                              |
| H-5             | 905.8         | 905.6    | 905.8    | $905.7 \pm 0.1$    | $3.0 \pm 0.5$                              |
| H-1'            | -420.9        | -421.1   | -420.8   | $-420.9 \pm 0.2$   | $1.0 \pm 0.7$                              |
| H-2'            | -1375.8       | -1376.1  | -1375.8  | $-1375.9 \pm 0.2$  | $1.0 \pm 0.7$                              |
| H-3'            | -1596.0       | -1596.4  | -1596.0  | $-1596.1 \pm 0.2$  | $0.7 \pm 0.7$                              |
| H-4'            | -1771.0       | -1771.2  | -1770.9  | $-1771.0 \pm 0.2$  | $0.7 \pm 0.7$                              |
| H-1''           | -             | -        | -        | -                  | -                                          |
| $^{11}\text{B}$ | 42.7          | 42.6     | 42.7     | $42.7 \pm 0.1$     | $-1.6 \pm 1.6$                             |
| $^{19}\text{F}$ | -27955.5      | -27955.1 | -27955.5 | $-27955.4 \pm 0.2$ | $38.2 \pm 0.8$                             |
